# Supplementary material
Source: HighWire-hosted journal article supplement (doi:10.1101/gr.280534.125)
Supplement: Supplemental_Figures.pdf.docx [file Supplemental_Figures.pdf.docx]

**ACTB methylation regulates SMARCA4 genomic occupancy to promote translation and reduce adhesion in colorectal cancer cells**

Elina Abaev-Schneiderman1,2, Linh Nguyen3, Raz Shalev1,2, Tzofit Elbaz Biton1,2, Anand Chopra1,2, Giritharan Jagadeesan1,2, Daniel Sevilla4, Nili Tickotsky Moskovitz4, Liron Levin4, Michal Feldman1,2, Capucine Van Rechem3 and Dan Levy1,2#

1The Shraga Segal Department of Microbiology, Immunology and Genetics

2National Institute for Biotechnology in the Negev, Ben-Gurion University of the Negev, P.O.B. 653, Be'er-Sheva 84105, Israel, 3Department of Pathology, Stanford University, Stanford, California, USA; 4Bioinformatics Core Facility, Ilse Katz Institute for Nanoscale Science and Technology, Ben-Gurion University of the Negev, Beer Sheva, Israel;

#Correspondence should be addressed to D.L: [ledan@post.bgu.ac.il](mailto:ledan@post.bgu.ac.il)


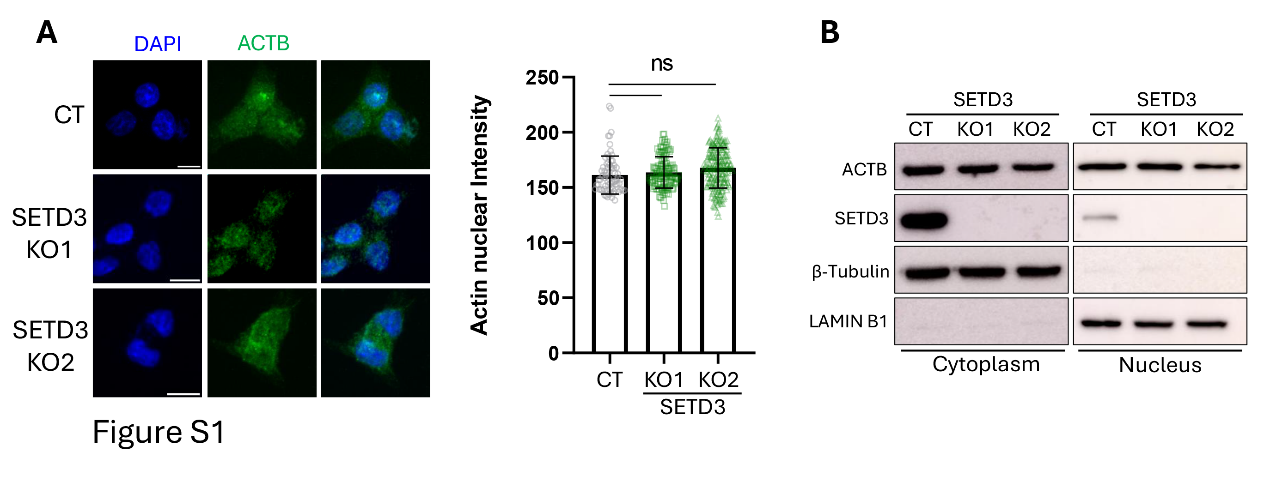
Figures

**Figure S1: SETD3 depletion does not affect ACTB localization.** **(A)** Left: Representative immunofluorescence images of control (CT) and SETD3 knockout (KO1, KO2) cells stained with DAPI (blue) and ACTB (green). Scale bars = 10 μm. Right: Quantification of nuclear ACTB fluorescence intensity in control and SETD3 knockout cells. Each dot represents an individual cell. **(B)** Western blot analysis of cytoplasmic and nuclear fractions from control and SETD3 KO cells. Lamin B1 and β-tubulin were used as nuclear and cytoplasmic markers, respectively.

**
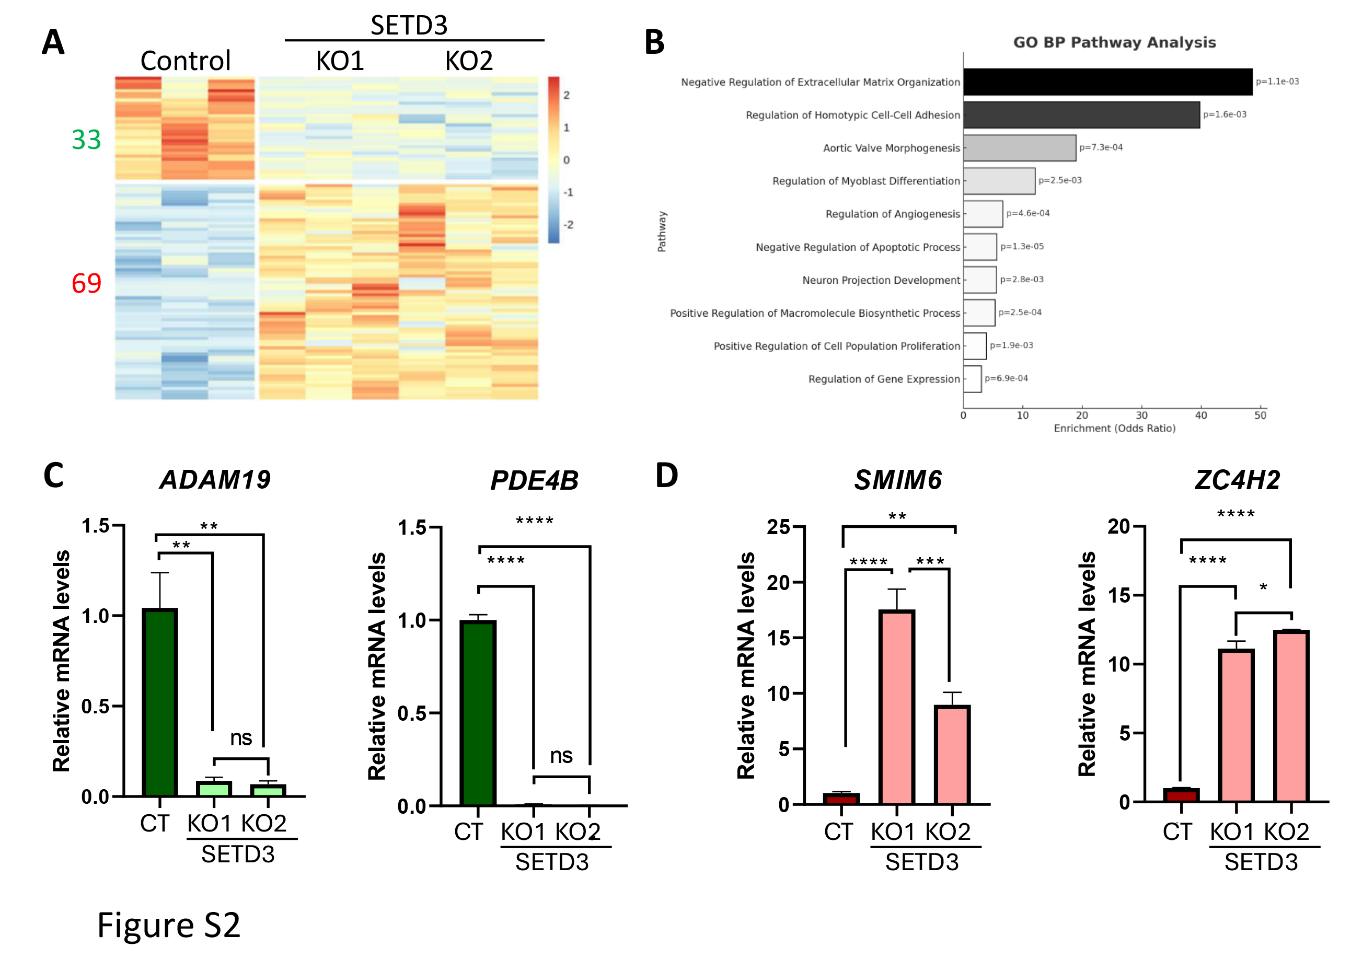
**

**Figure S2. RNA-seq for control and SETD3 KO cells (A)** Heatmap of differentially expressed genes, showing two major clusters: 33 downregulated genes (green) and 69 upregulated genes (red). Gene expression values are z-score normalized, with red indicating higher expression and blue indicating lower expression across samples. **(B)** Gene Ontology (GO) Biological Process (BP) enrichment analysis of the clustered genes. The bar plot shows significantly enriched pathways, ordered by enrichment (odds ratio). Bars are shaded according to statistical significance, with adjusted *p*-values indicated on the right. **(C+D)** qPCR validation of selected target genes from RNA-seq analysis for the downregulated (C) and upregulated (D) in the SETD3 HCT116 depleted cells. Data are presented as mean ± SEM from three independent experiments, normalized to GAPDH. Statistical analysis was performed for two experimental repeats using one-way ANOVA (** p<0.01, *** p<0.001, **** p<0.0001).

**
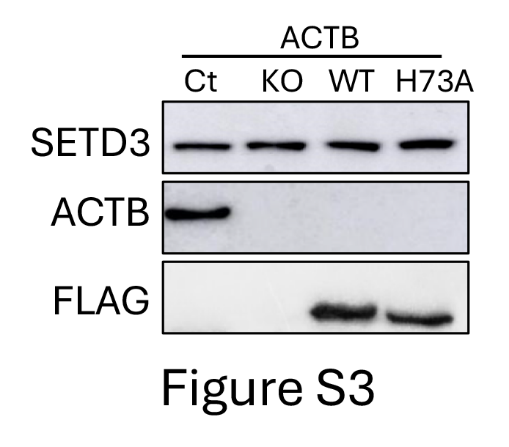
**

**Figure S3:** Western blot analysis with the indicated antibodies of protein extracts from control (CT) and KO ACTB KO cells expressing empty vector, FLAG-WT ACTB or FLAG-ACTB H73A.

**
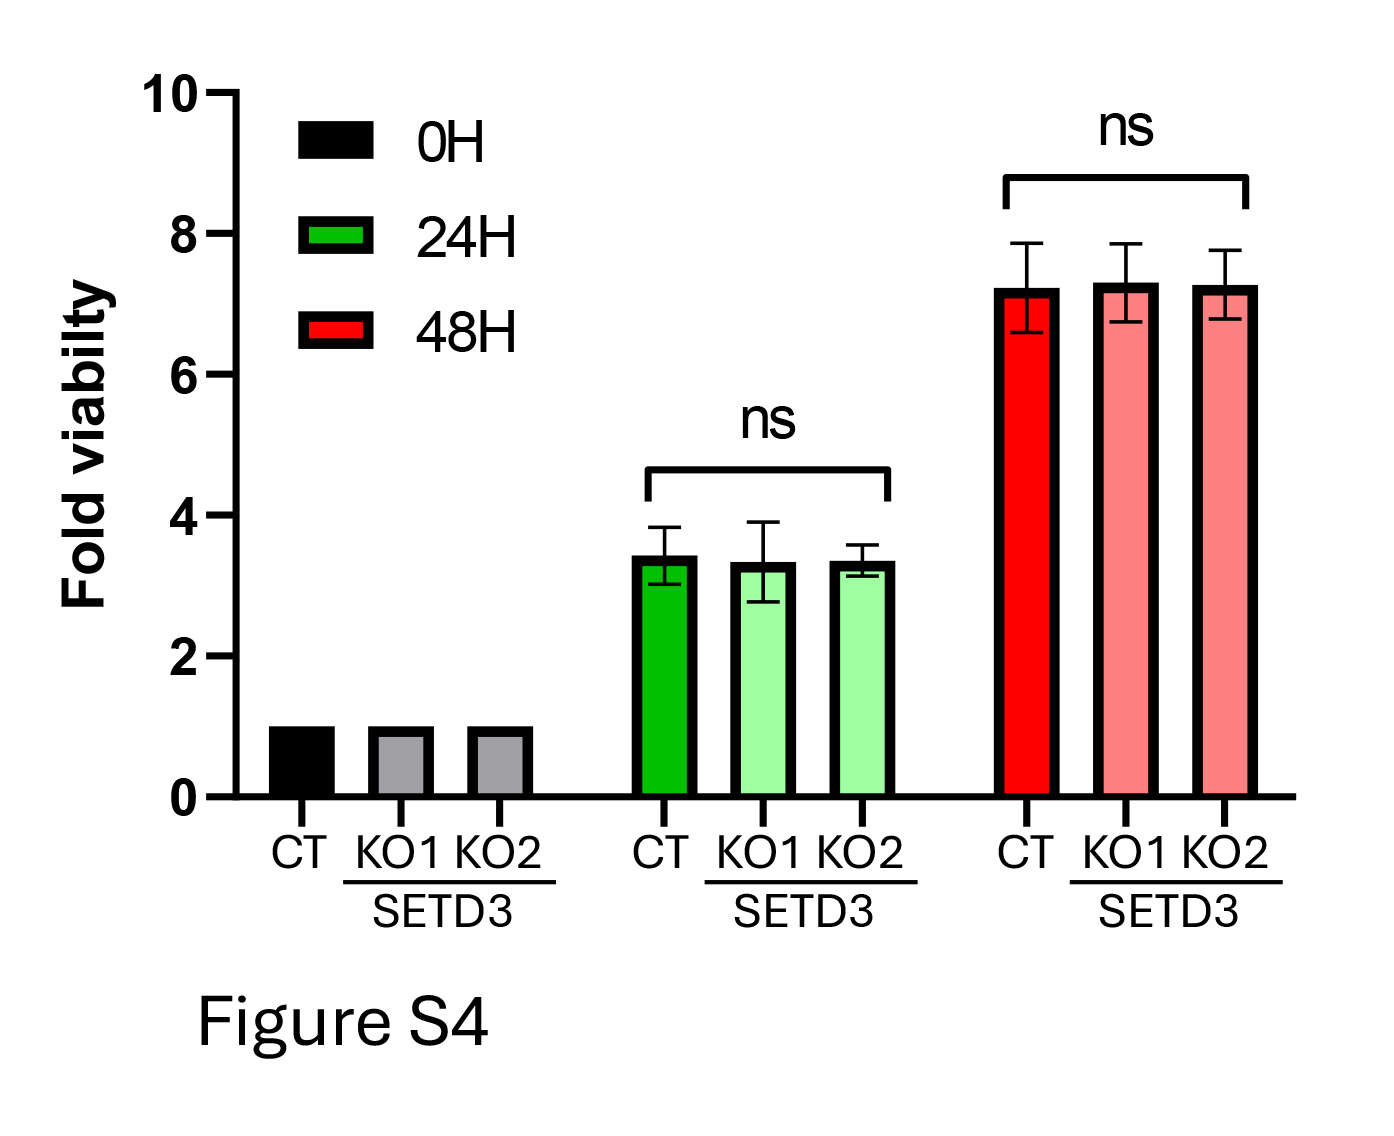
**

**Figure S4:** **Cell viability assay in control and SETD3 knockout cells.** Viability of Control and SETD6 KO HCT116 cells were measured every 24 has indicated, using the PrestoBlue reagent. Each measurement was normalized to the T(0) value taken 18 h after plating the cells to allow adherence. Standard deviation represents 8 repeats of each condition. Statistical analysis was performed using the 2way ANOVA, followed by the Tukey’s multiple comparisons test., ns: not significant.


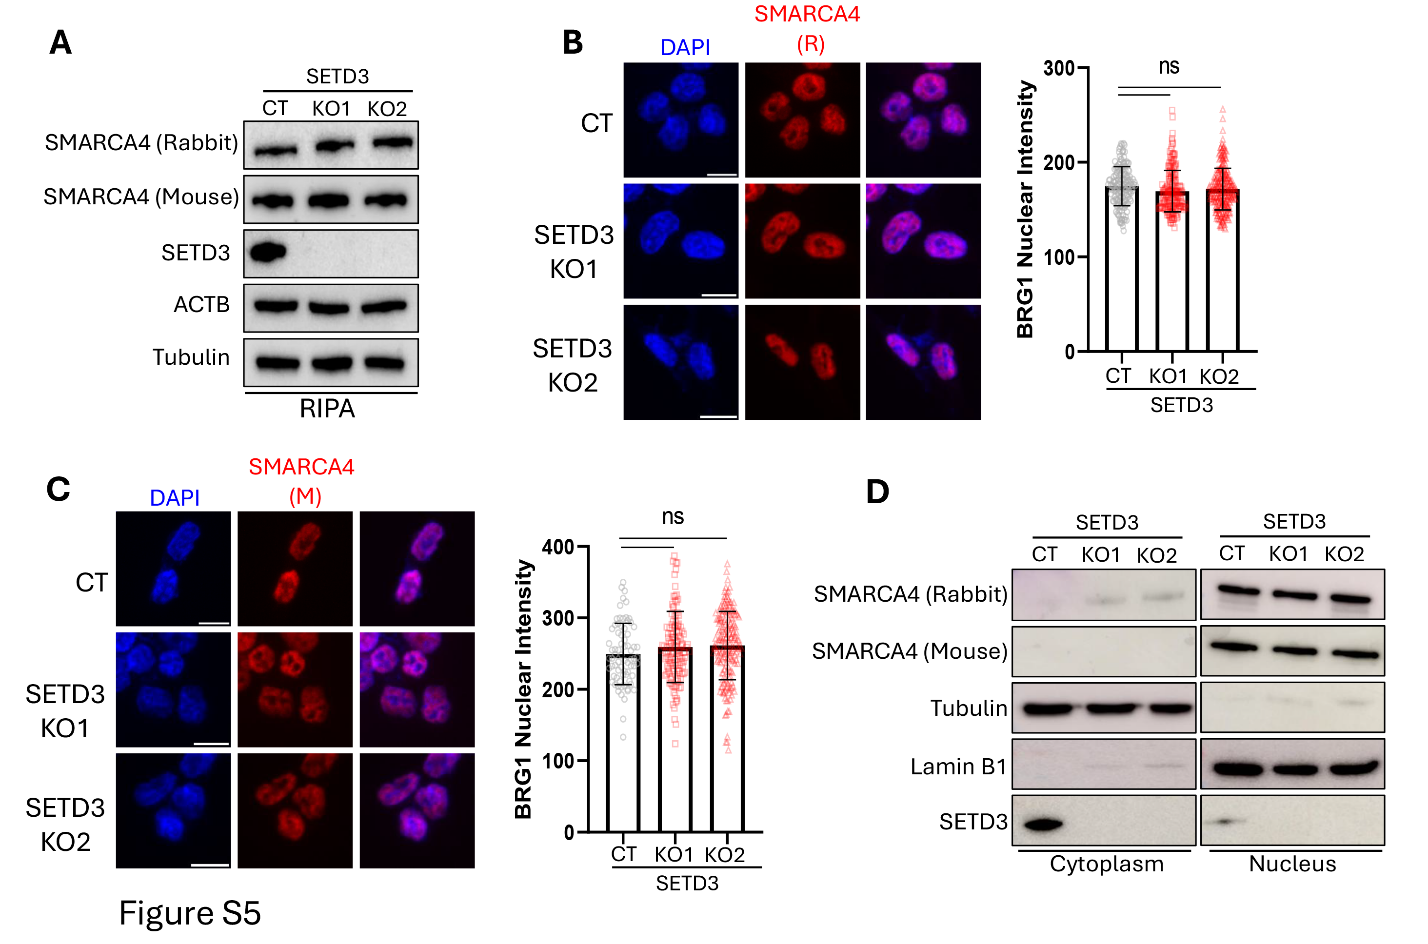


**Figure S5: SETD3 depletion does not affect SMARCA4 localization.** **(A)** Western blot analysis of whole cell extracts from control (CT) and two independent SETD3 knockout (KO1 and KO2) HCT116 cell lines using the indicated antibodies. **(B+C)** Left- Representative immunofluorescence (IF) images stained with DAPI (blue) and ACTB (green) in control and SETD3 KO cells showing SMARCA4 localization using Rabbit (R) and Mouse (M) antibodies. Merged images are shown in the right panels. Scale bars, 10 µm. Right- Quantification of nuclear SMARCA4 fluorescence intensity in control and SETD3 knockout cells. Each dot represents an individual cell **(D)** Western blot analysis of cytoplasmic and nuclear fractions from control and SETD3 KO cells. Lamin B1 and β-tubulin were used as nuclear and cytoplasmic markers, respectively.
