# Supplementary material
Source: HighWire-hosted journal article supplement (doi:10.1101/gr.280534.125)
Supplement: Supplemental_Table_S1.xlsx [file Supplemental_Table_S1.xlsx]

## Sheet: Full GO enrichment list
GO pathways Clusters 1+3									GO pathways Clusters 2+4
Term	P-value	Adjusted P-value	Odds Ratio	Combined Score					Term	P-value	Adjusted P-value	Odds Ratio	Combined Score
Integrin-Mediated Signaling Pathway (GO:0007229)	7.13797e-06	0.00705945	14.5676	172.628					Macromolecule Biosynthetic Process (GO:0009059)	7.2112e-08	5.79059e-05	13.7076	225.423
Regulation of Potassium Ion Transmembrane Transport (GO:1901379)	6.3264e-05	0.0312841	21.2137	205.098					Cytoplasmic Translation (GO:0002181)	3.4111e-06	0.00120746	16.6939	210.151
Cell-Matrix Adhesion (GO:0007160)	0.000287214	0.0568108	9.41843	76.81					Translation (GO:0006412)	4.51107e-06	0.00120746	9.63552	118.603
Cell-Substrate Junction Assembly (GO:0007044)	0.000505144	0.0832646	21.8308	165.71					mRNA Cis Splicing, via Spliceosome (GO:0045292)	5.91762e-05	0.0118796	47.8438	465.758
Defense Response to Virus (GO:0051607)	0.000723138	0.0979057	6.03554	43.6485					Gene Expression (GO:0010467)	0.000154273	0.0247763	5.7427	50.4025
Regulation of RNA Splicing (GO:0043484)	0.00244372	0.161123	7.61231	45.7822					Heart Induction (GO:0003129)	0.000335753	0.0449349	100.83	806.556
Negative Regulation of Protein Ubiquitination (GO:0031397)	0.00279231	0.161328	11.5703	68.0434					Regulation of Heart Morphogenesis (GO:2000826)	0.000446494	0.047486	84.0211	648.146
Regulation of Primary Metabolic Process (GO:0080090)	0.00329775	0.161328	6.98059	39.8907					Regulation of Intracellular Protein Transport (GO:0033157)	0.000487403	0.047486	21.8505	166.641
Cell Junction Maintenance (GO:0034331)	0.00372655	0.161328	25.0025	139.821					Positive Regulation of Cell Adhesion (GO:0045785)	0.000532221	0.047486	11.7066	88.2497
Focal Adhesion Assembly (GO:0048041)	0.00621938	0.17086	18.7472	95.2372					Regulation of Ossification (GO:0030278)	0.00075194	0.0603808	18.6473	134.127
Positive Regulation of Protein Polymerization (GO:0032273)	0.00670666	0.179267	8.32941	41.6858					Positive Regulation of Keratinocyte Proliferation (GO:0010838)	0.00104144	0.0696895	50.4025	346.122
RNA Splicing, via Transesterification Reactions (GO:0000375)	0.00737897	0.182445	17.0412	83.6571					Positive Regulation of Vascular Endothelial Cell Proliferation (GO:1905564)	0.00104144	0.0696895	50.4025	346.122
Regulation of Ruffle Assembly (GO:1900027)	0.00737897	0.182445	17.0412	83.6571					Positive Regulation of Epithelial Cell Proliferation (GO:0050679)	0.00135003	0.0768933	9.02483	59.6328
Regulation of Cellular Response to Growth Factor Stimulus (GO:0090287)	0.00737897	0.182445	17.0412	83.6571					Endoderm Development (GO:0007492)	0.00142839	0.0768933	41.9979	275.137
Import Into Nucleus (GO:0051170)	0.00780142	0.188185	7.86508	38.1728					Negative Regulation of Catabolic Process (GO:0009895)	0.00143636	0.0768933	8.86834	58.049
Regulation of BMP Signaling Pathway (GO:0030510)	0.00838599	0.19394	7.65174	36.5844					Regulation of Protein Catabolic Process (GO:0042176)	0.00187292	0.0847518	8.22608	51.6619
Intracellular Protein Transport (GO:0006886)	0.00854745	0.19394	3.59779	17.1331					Positive Regulation of Cartilage Development (GO:0061036)	0.00211799	0.0847518	33.5932	206.843
Blood Vessel Endothelial Cell Migration (GO:0043534)	0.00862828	0.19394	15.6195	74.2349					Regulation of Cartilage Development (GO:0061035)	0.00211799	0.0847518	33.5932	206.843
Protein Import Into Nucleus (GO:0006606)	0.00931001	0.204613	7.3525	34.3852					Negative Regulation of Metabolic Process (GO:0009892)	0.00213352	0.0847518	12.7301	78.2901
Regulation of Transmembrane Receptor Protein Serine/Threonine Kinase Signaling Pathway (GO:0090092)	0.00996527	0.209695	14.4165	66.4408					Positive Regulation of Binding (GO:0051099)	0.00223196	0.0847518	12.5208	76.438
Phospholipid Biosynthetic Process (GO:0008654)	0.00996527	0.209695	14.4165	66.4408					Regulation of Vascular Endothelial Cell Proliferation (GO:1905562)	0.00237649	0.0847518	31.4921	190.279
Actin Filament Organization (GO:0007015)	0.0106485	0.215279	4.92957	22.3918					Mesenchyme Development (GO:0060485)	0.00237649	0.0847518	31.4921	190.279
Response to Interferon-Beta (GO:0035456)	0.010666	0.215279	13.8819	63.0334					Regulation of Autophagy (GO:0010506)	0.00242751	0.0847518	5.75848	34.6712
Phosphatidic Acid Biosynthetic Process (GO:0006654)	0.0121308	0.235242	12.9232	57.0174					Cellular Response to Growth Factor Stimulus (GO:0071363)	0.00323314	0.108175	7.0354	40.3431
Establishment of Mitotic Spindle Orientation (GO:0000132)	0.0121308	0.235242	12.9232	57.0174					Chaperone-Mediated Protein Complex Assembly (GO:0051131)	0.00355059	0.108995	25.1886	142.08
Establishment of Protein Localization to Organelle (GO:0072594)	0.012807	0.239228	6.50411	28.3434					Endocardial Cushion Development (GO:0003197)	0.00355059	0.108995	25.1886	142.08
Membrane Depolarization (GO:0051899)	0.0128944	0.239228	12.4918	54.3515					Positive Regulation of Cellular Process (GO:0048522)	0.00366485	0.108995	3.44563	19.3264
RNA Splicing (GO:0008380)	0.0135846	0.239228	6.3573	27.3289					Lymphocyte Activation Involved in Immune Response (GO:0002285)	0.00387856	0.111232	23.9879	133.188
Negative Regulation of Apoptotic Process (GO:0043066)	0.0145776	0.239228	2.87653	12.1628					Positive Regulation of Morphogenesis of an Epithelium (GO:1905332)	0.00422009	0.116853	22.8964	125.195
Regulation of Actin Filament-Based Process (GO:0032970)	0.0152191	0.239228	6.08264	25.4571					Regulation of Fatty Acid Biosynthetic Process (GO:0042304)	0.00494334	0.127576	20.9863	111.431
Platelet Aggregation (GO:0070527)	0.0153067	0.239228	11.3545	47.4557					Limb Development (GO:0060173)	0.00494334	0.127576	20.9863	111.431
Regulation of Canonical NF-kappaB Signal Transduction (GO:0043122)	0.0156247	0.239228	3.59535	14.9527					Regulation of Keratinocyte Proliferation (GO:0010837)	0.00532485	0.127576	20.1458	105.471
Positive Regulation of Supramolecular Fiber Organization (GO:1902905)	0.0160763	0.239228	5.95398	24.5924					Positive Regulation of DNA Binding (GO:0043388)	0.00532485	0.127576	20.1458	105.471
Negative Regulation of Plasma Membrane Bounded Cell Projection Assembly (GO:0120033)	0.0161506	0.239228	11.02	45.4662					Positive Regulation of Endothelial Cell Migration (GO:0010595)	0.005484	0.127576	8.97466	46.7214
Phosphatidic Acid Metabolic Process (GO:0046473)	0.0161506	0.239228	11.02	45.4662					Cellular Response to Epidermal Growth Factor Stimulus (GO:0071364)	0.00571947	0.127576	19.37	100.024
Establishment of Mitotic Spindle Localization (GO:0040001)	0.0161506	0.239228	11.02	45.4662					Positive Regulation of Leukocyte Migration (GO:0002687)	0.00571947	0.127576	19.37	100.024
Positive Regulation of Interferon-Beta Production (GO:0032728)	0.017014	0.239228	10.7046	43.6074					T Cell Activation Involved in Immune Response (GO:0002286)	0.00654758	0.138361	17.9846	90.4386
Negative Regulation of Programmed Cell Death (GO:0043069)	0.0175279	0.239228	3.05319	12.347					Negative Regulation of Ossification (GO:0030279)	0.00654758	0.138361	17.9846	90.4386
Positive Regulation of Protein Localization (GO:1903829)	0.0178706	0.239228	5.71227	22.9896					Response to Epidermal Growth Factor (GO:0070849)	0.00698086	0.143734	17.3636	86.203
Regulation of Potassium Ion Transport (GO:0043266)	0.0178967	0.239228	10.4067	41.8676
Regulation of Actin Cytoskeleton Organization (GO:0032956)	0.018808	0.239228	5.59859	22.2458
Positive Regulation of Protein-Containing Complex Assembly (GO:0031334)	0.0192868	0.239228	5.54342	21.8873
Negative Regulation of Proteolysis (GO:0045861)	0.019719	0.239228	9.85799	38.7042
Establishment of Spindle Orientation (GO:0051294)	0.019719	0.239228	9.85799	38.7042
Regulation of Heart Rate by Cardiac Conduction (GO:0086091)	0.0206581	0.239228	9.60474	37.263
Positive Regulation of Actin Filament Polymerization (GO:0030838)	0.0206581	0.239228	9.60474	37.263
Glycerophospholipid Biosynthetic Process (GO:0046474)	0.0217815	0.239228	5.28304	20.2166
Protein Localization to Membrane (GO:0072657)	0.0228672	0.239228	3.88501	14.6778
Regulation of Protein Ubiquitination (GO:0031396)	0.0233591	0.239228	5.13818	19.303
Negative Regulation of Organelle Organization (GO:0010639)	0.0235848	0.239228	8.91734	33.4146
Regulation of Monoatomic Cation Transmembrane Transport (GO:1904062)	0.0235848	0.239228	8.91734	33.4146
Regulation of Autophagosome Assembly (GO:2000785)	0.0235848	0.239228	8.91734	33.4146
Regulation of Nitric Oxide Biosynthetic Process (GO:0045428)	0.0245961	0.239228	8.70952	32.2703
Homotypic Cell-Cell Adhesion (GO:0034109)	0.0256248	0.239228	8.51115	31.1865
Cardiac Conduction (GO:0061337)	0.0266708	0.239228	8.32159	30.159
Cellular Defense Response (GO:0006968)	0.0266708	0.239228	8.32159	30.159
Positive Regulation of Pattern Recognition Receptor Signaling Pathway (GO:0062208)	0.0266708	0.239228	8.32159	30.159
ATP Synthesis Coupled Electron Transport (GO:0042773)	0.0267124	0.239228	46.4673	168.334
Regulation of Enamel Mineralization (GO:0070173)	0.0267124	0.239228	46.4673	168.334
DNA Double-Strand Break Processing Involved in Repair via Single-Strand Annealing (GO:0010792)	0.0267124	0.239228	46.4673	168.334
Negative Regulation of Insulin-Like Growth Factor Receptor Signaling Pathway (GO:0043569)	0.0267124	0.239228	46.4673	168.334
ISG15-protein Conjugation (GO:0032020)	0.0267124	0.239228	46.4673	168.334
Regulation of Long-Chain Fatty Acid Import Across Plasma Membrane (GO:0010746)	0.0267124	0.239228	46.4673	168.334
Negative Regulation of Protein Targeting to Membrane (GO:0090315)	0.0267124	0.239228	46.4673	168.334
Adenosine to Inosine Editing (GO:0006382)	0.0267124	0.239228	46.4673	168.334
Negative Regulation of Trophoblast Cell Migration (GO:1901164)	0.0267124	0.239228	46.4673	168.334
Regulation of Plasma Membrane Repair (GO:1905684)	0.0267124	0.239228	46.4673	168.334
Axo-Dendritic Transport (GO:0008088)	0.0267124	0.239228	46.4673	168.334
Regulation of T-Circle Formation (GO:1904429)	0.0267124	0.239228	46.4673	168.334
Double-Strand Break Repair via Single-Strand Annealing (GO:0045002)	0.0267124	0.239228	46.4673	168.334
Positive Regulation of Gap Junction Assembly (GO:1903598)	0.0267124	0.239228	46.4673	168.334
Positive Regulation of Podosome Assembly (GO:0071803)	0.0267124	0.239228	46.4673	168.334
Hyaluronan Biosynthetic Process (GO:0030213)	0.0267124	0.239228	46.4673	168.334
Positive Regulation of Urine Volume (GO:0035810)	0.0267124	0.239228	46.4673	168.334
Postsynaptic Density Protein 95 Clustering (GO:0097119)	0.0267124	0.239228	46.4673	168.334
Postsynaptic Membrane Assembly (GO:0097104)	0.0267124	0.239228	46.4673	168.334
Prevention of Polyspermy (GO:0060468)	0.0267124	0.239228	46.4673	168.334
Protein Geranylgeranylation (GO:0018344)	0.0267124	0.239228	46.4673	168.334
Membrane Repolarization During Ventricular Cardiac Muscle Cell Action Potential (GO:0098915)	0.0267124	0.239228	46.4673	168.334
Negative Regulation of T-helper 17 Cell Lineage Commitment (GO:2000329)	0.0267124	0.239228	46.4673	168.334
Negative Regulation of Cell Fate Commitment (GO:0010454)	0.0267124	0.239228	46.4673	168.334
Actin Polymerization or Depolymerization (GO:0008154)	0.0288139	0.239228	7.96668	28.257
Positive Regulation of Smooth Muscle Cell Proliferation (GO:0048661)	0.0288139	0.239228	7.96668	28.257
Regulation of Interferon-Beta Production (GO:0032648)	0.0310235	0.239228	7.64074	26.5364
Negative Regulation of Membrane Protein Ectodomain Proteolysis (GO:0051045)	0.0319695	0.239228	37.172	127.982
RIG-I Signaling Pathway (GO:0039529)	0.0319695	0.239228	37.172	127.982
Negative Regulation of Ruffle Assembly (GO:1900028)	0.0319695	0.239228	37.172	127.982
Regulation of Potassium Ion Export Across Plasma Membrane (GO:1903764)	0.0319695	0.239228	37.172	127.982
Regulation of Respiratory System Process (GO:0044065)	0.0319695	0.239228	37.172	127.982
Parallel Actin Filament Bundle Assembly (GO:0030046)	0.0319695	0.239228	37.172	127.982
Interleukin-27-Mediated Signaling Pathway (GO:0070106)	0.0319695	0.239228	37.172	127.982
Regulation of Atrial Cardiac Muscle Cell Membrane Repolarization (GO:0060372)	0.0319695	0.239228	37.172	127.982
Regulation of Cell Adhesion Molecule Production (GO:0060353)	0.0319695	0.239228	37.172	127.982
Negative Regulation of Protein Catabolic Process (GO:0042177)	0.033298	0.239228	7.34036	24.9738
Positive Regulation of Protein Localization to Plasma Membrane (GO:1903078)	0.0356358	0.239228	7.06266	23.5497
Regulation of Autophagy (GO:0010506)	0.0361554	0.239228	3.34683	11.1113
Response to Peptide Hormone (GO:0043434)	0.036828	0.239228	6.93152	22.8844
Supramolecular Fiber Organization (GO:0097435)	0.0368393	0.239228	2.84257	9.38385
Regulation of Apoptotic Process (GO:0042981)	0.0368781	0.239228	2.20644	7.28155
Apoptotic Process (GO:0006915)	0.037138	0.239228	3.31714	10.9237
Negative Regulation of Fatty Acid Oxidation (GO:0046322)	0.0371984	0.239228	30.9751	101.954
T Follicular Helper Cell Differentiation (GO:0061470)	0.0371984	0.239228	30.9751	101.954
Negative Regulation of Regulated Secretory Pathway (GO:1903306)	0.0371984	0.239228	30.9751	101.954
Regulation of Microvillus Organization (GO:0032530)	0.0371984	0.239228	30.9751	101.954
Negative Regulation of Voltage-Gated Calcium Channel Activity (GO:1901386)	0.0371984	0.239228	30.9751	101.954
Blood Coagulation, Intrinsic Pathway (GO:0007597)	0.0371984	0.239228	30.9751	101.954
Peptidyl-Lysine Hydroxylation (GO:0017185)	0.0371984	0.239228	30.9751	101.954
Polysaccharide Metabolic Process (GO:0005976)	0.0371984	0.239228	30.9751	101.954
Dendritic Spine Maintenance (GO:0097062)	0.0371984	0.239228	30.9751	101.954
Positive Regulation of Extracellular Matrix Disassembly (GO:0090091)	0.0371984	0.239228	30.9751	101.954
Telomeric D-loop Disassembly (GO:0061820)	0.0371984	0.239228	30.9751	101.954
Positive Regulation of Leukocyte Differentiation (GO:1902107)	0.0371984	0.239228	30.9751	101.954
Positive Regulation of Microtubule Nucleation (GO:0090063)	0.0371984	0.239228	30.9751	101.954
Positive Regulation of Monocyte Chemotactic Protein-1 Production (GO:0071639)	0.0371984	0.239228	30.9751	101.954
Positive Regulation of Tooth Mineralization (GO:0070172)	0.0371984	0.239228	30.9751	101.954
Postsynapse Assembly (GO:0099068)	0.0371984	0.239228	30.9751	101.954
Regulation of CD8-positive, Alpha-Beta T Cell Differentiation (GO:0043376)	0.0371984	0.239228	30.9751	101.954
Regulation of CD8-positive, Alpha-Beta T Cell Proliferation (GO:2000564)	0.0371984	0.239228	30.9751	101.954
Negative Regulation of CD8-positive, Alpha-Beta T Cell Activation (GO:2001186)	0.0371984	0.239228	30.9751	101.954
Reg of Cardiac Muscle Cell Action Potential Inv in Reg of Contraction (GO:0098909)	0.0371984	0.239228	30.9751	101.954
Protein Localization to Cell Periphery (GO:1990778)	0.0374585	0.239228	4.24468	13.9418
Positive Regulation of Protein Localization to Cell Periphery (GO:1904377)	0.0380353	0.239228	6.80515	22.2477
Positive Regulation of DNA-templated Transcription Initiation (GO:2000144)	0.0404949	0.239228	6.56571	21.0535
Cellular Response to Starvation (GO:0009267)	0.0409872	0.239228	4.08986	13.065
Regulation of Extent of Cell Growth (GO:0061387)	0.0423993	0.239228	26.5487	83.9105
Regulation of Gap Junction Assembly (GO:1903596)	0.0423993	0.239228	26.5487	83.9105
Negative Regulation of Nitric Oxide Biosynthetic Process (GO:0045019)	0.0423993	0.239228	26.5487	83.9105
Negative Regulation of Nitric Oxide Metabolic Process (GO:1904406)	0.0423993	0.239228	26.5487	83.9105
Negative Regulation of Retrograde Protein Transport, ER to Cytosol (GO:1904153)	0.0423993	0.239228	26.5487	83.9105
Regulation of Pinocytosis (GO:0048548)	0.0423993	0.239228	26.5487	83.9105
Regulation of Podosome Assembly (GO:0071801)	0.0423993	0.239228	26.5487	83.9105
Autophagosome-Lysosome Fusion (GO:0061909)	0.0423993	0.239228	26.5487	83.9105
Regulation of Urine Volume (GO:0035809)	0.0423993	0.239228	26.5487	83.9105
Retrograde Transport, Vesicle Recycling Within Golgi (GO:0000301)	0.0423993	0.239228	26.5487	83.9105
Skin Morphogenesis (GO:0043589)	0.0423993	0.239228	26.5487	83.9105
Endochondral Ossification (GO:0001958)	0.0423993	0.239228	26.5487	83.9105
Ventricular Cardiac Muscle Cell Membrane Repolarization (GO:0099625)	0.0423993	0.239228	26.5487	83.9105
Positive Regulation of Synaptic Transmission, GABAergic (GO:0032230)	0.0423993	0.239228	26.5487	83.9105
Postsynaptic Density Organization (GO:0097106)	0.0423993	0.239228	26.5487	83.9105
Presynaptic Membrane Assembly (GO:0097105)	0.0423993	0.239228	26.5487	83.9105
Maintenance of Synapse Structure (GO:0099558)	0.0423993	0.239228	26.5487	83.9105
Negative Regulation of Alpha-Beta T Cell Differentiation (GO:0046639)	0.0423993	0.239228	26.5487	83.9105
Negative Regulation of Alpha-Beta T Cell Proliferation (GO:0046642)	0.0423993	0.239228	26.5487	83.9105
Regulation of Chemokine (C-C Motif) Ligand 5 Production (GO:0071649)	0.0423993	0.239228	26.5487	83.9105
Intracellular Signaling Cassette (GO:0141124)	0.0430384	0.239228	2.71831	8.55088
Negative Regulation of Protein Metabolic Process (GO:0051248)	0.044678	0.239228	3.94585	12.2648
Positive Regulation of Cell Motility (GO:2000147)	0.0461095	0.239228	3.0843	9.48958
Golgi Lumen Acidification (GO:0061795)	0.0475724	0.239228	23.229	70.7439
Negative Regulation of Muscle Cell Differentiation (GO:0051148)	0.0475724	0.239228	23.229	70.7439
Negative Regulation of Protein Exit From Endoplasmic Reticulum (GO:0070862)	0.0475724	0.239228	23.229	70.7439
Negative Regulation of Transcription by RNA Polymerase I (GO:0016479)	0.0475724	0.239228	23.229	70.7439
Negative Regulation of Voltage-Gated Potassium Channel Activity (GO:1903817)	0.0475724	0.239228	23.229	70.7439
Response to Type I Interferon (GO:0034340)	0.0475724	0.239228	23.229	70.7439
Positive Regulation of Calcium Ion Transport Into Cytosol (GO:0010524)	0.0475724	0.239228	23.229	70.7439
Telomeric Loop Disassembly (GO:0090657)	0.0475724	0.239228	23.229	70.7439
Presynaptic Membrane Organization (GO:0097090)	0.0475724	0.239228	23.229	70.7439
Protein Prenylation (GO:0018342)	0.0475724	0.239228	23.229	70.7439
Mitochondrial Respirasome Assembly (GO:0097250)	0.0475724	0.239228	23.229	70.7439
Modification-Dependent Macromolecule Catabolic Process (GO:0043632)	0.0475724	0.239228	23.229	70.7439
Negative Regulation of PERK-mediated Unfolded Protein Response (GO:1903898)	0.0475724	0.239228	23.229	70.7439
Cellular Response to Virus (GO:0098586)	0.0482191	0.239228	5.9386	18.0058
Positive Regulation of Cell Junction Assembly (GO:1901890)	0.0482191	0.239228	5.9386	18.0058
Positive Regulation of Organelle Assembly (GO:1902117)	0.0482191	0.239228	5.9386	18.0058
Cell-Cell Junction Organization (GO:0045216)	0.0495549	0.239228	5.84552	17.5639

## Sheet: README
Complete Gene Ontology (GO) enrichment results for differentially expressed genes from the RNA-seq experiments shown in Figure 2, reported separately for Clusters 1+3 and Clusters 2+4.
