# Supplementary material
Source: HighWire-hosted journal article supplement (doi:10.1101/gr.280534.125)
Supplement: Supplemental_Table_S2.xlsx [file Supplemental_Table_S2.xlsx]

## Sheet: Peptide numbers per group 
SETD3s					Shared						ACTB
Total Protein = 660					Total Protein = 161						Total Protein = 109
Protein	Number of peptides in each sample				Protein	Number of peptides in each sample					Protein	Number of peptides in each sample
	SETD3#1 (13279)	SETD3#2 (14466)				Actin	SETD3#1 (13279)	SETD3#2 (14466)				Actin
PRPF40A	28	23			YBX1	15	14	11			PHF5A	9
ACTN4	20	19			CDH3	17	12	16			CDC27	14
RPS11	21	17			ORC3	12	11	8			TUBA4A	18
NUP35	12	10			NCOA5	19	23	18			PHIP	17
URB2	18	12			RPL26	11	16	15			MRPS35	10
RPS17	14	16			SLC25A3	9	8	25			MED4	10
ANXA2	11	22			EIF6	9	8	11			ATP5A1	18
TFIP11	24	12			HNRNPH1	16	14	15			DDX28	8
ACTR3	9	15			DDB1	28	37	43			PAPD5	9
AAAS	19	11			MTA2	23	19	14			MRPL38	9
GNL3	36	22			CRNKL1	23	18	11			CACTIN	9
UTP20	31	30			IGF2BP3	10	15	15			SP110	11
RAE1	17	10			SMARCC2	21	24	11			SNIP1	8
ATRX	14	8			HLTF	14	16	16			LARP7	14
PDHA1	9	10			SMARCC1	31	32	23			INTS6	18
BYSL	16	12			CD2BP2	10	12	12			MTA3	10
HSPB1	10	8			MRPL45	9	8	9			RBM17	20
PFKP	22	10			PTCD3	16	12	14			SPTY2D1	11
TK1	9	16			CHD1	28	33	34			ZNF148	12
MYO1B	28	28			GNAI2	8	13	13			GTF3C3	13
COPB2	9	17			PUF60	24	21	18			SYMPK	16
BUB3	10	11			ILF2	13	18	18			SGPL1	8
RPL10A	18	10			ACTL6A	17	17	8			HNRNPDL	9
CTR9	30	23			ACSL3	11	8	11			CCAR1	15
GNL3L	15	12			FUBP3	9	8	8			CDH1	13
U2SURP	33	23			HNRNPA2B1	29	39	38			MRPS5	12
RPS18	18	13			SNRPA1	9	13	10			SMARCB1	12
H3-3A	25	24			SMARCD2	14	11	8			MRPL47	8
BRIX1	24	20			RALY	21	15	15			SRSF11	9
EIF2AK2	16	15			RBM14	26	32	30			ASUN	17
HSD17B10	10	9			DAP3	11	10	12			UHRF2	9
G3BP1	14	10			RBM10	23	16	10			ATP5B	13
NUP155	34	36			HNRNPF	14	12	14			PTRF	12
ESYT1	9	8			MRPL19	8	8	8			GADD45GIP1	8
RAB1B	9	9			HSPA9	17	28	28			FEN1	8
RBM15	27	12			SRSF6	15	20	19			GNB2L1	13
KRT14	16	24			AFG3L2	11	10	23			CHD3	18
PGAM5	21	20			MRPL39	13	9	10			GATAD2A	24
SLTM	16	8			PRPF31	14	14	12			RAD50	12
EPPK1	13	10			IQGAP1	20	20	31			GLYR1	10
TPX2	13	23			TUBB	21	33	24			RSBN1	8
RPL19	11	11			SMARCA4	36	31	16			WDHD1	21
MDC1	12	11			YME1L1	9	8	11			MRPL15	13
EEF2	40	29			FIP1L1	17	17	11			CDK5RAP3	8
XAB2	17	12			HNRNPR	26	18	32			DPF2	17
KRT9	20	24			BAZ2A	28	37	13			XPC	19
MOV10	10	19			NUP37	8	9	8			WTAP	9
MATR3	43	30			XRCC6	18	30	26			ATP1A1	9
UTP4	19	18			SUPT5H	15	22	13			APOBEC3C	8
NUP98	57	45			NPM1	23	32	51			FAM169A	10
DDX5	45	42			PWP2	28	28	28			CIRH1A	25
IMP4	12	8			TOP2A	67	59	58			FAM83H	10
RPLP0	24	18			SYNCRIP	16	28	30			PEO1	8
HNRNPD	12	10			UQCRC1	8	11	19			RNPS1	9
PRPF4	15	16			SAMM50	9	8	18			PRPF4B	25
NDUFS1	11	26			RPS27A	9	11	10			SLC25A22	8
U2AF2	24	14			TUBA1C	19	26	19			SMN1	10
CTNNBL1	12	9			GTF3C4	23	24	12			MRPS7	8
MYH14	10	13			RBM22	16	16	10			NHP2	9
GNAI3	10	9			BAG2	8	10	11			CBX3	10
IGF2BP2	15	9			HDAC2	14	17	12			BUD13	11
DSP	121	114			ATAD3B	27	17	22			SEC13	9
THRAP3	39	39			MRPS31	11	9	8			CDCA2	10
NUP214	23	14			PPP1CB	16	19	16			MBD3	11
NOSIP	8	15			NOP14	27	22	22			NCAPD3	10
LYAR	27	24			NCL	42	39	76			GTF3C5	16
PELP1	27	17			DNAJA3	12	11	10			LARP1	11
LMNB1	73	58			DHX16	20	15	11			MEPCE	8
RFC2	17	17			KIF2A	12	14	8			ZC3H4	21
RACK1	18	16			CHD4	78	75	61			PCNA	8
RCL1	16	12			RRP9	19	27	19			QSER1	13
OSBPL8	9	11			RPS19	8	10	11			ELAVL1	10
NIFK	19	15			MCM4	14	25	20			FAM120A	10
MSN	14	30			MAK16	12	14	10			TAF9	9
EIF3B	16	15			CLPX	13	10	13			TCF20	11
RPS5	13	18			STOML2	12	8	11			NHP2L1	12
RPL36A	8	8			HTATSF1	27	13	17			CBX1	8
DNAJB1	10	9			SF3A3	21	26	17			YBX3	9
WDR46	12	20			MSH2	23	22	31			NFXL1	22
NSF	13	18			RPS8	12	16	17			CPSF4	10
CAPZA1	10	13			MTA1	25	14	9			TRIM27	8
RPL7A	28	20			NSA2	13	11	10			TUBB8	11
NOC4L	21	16			POLR2A	58	56	32			H2AFY2	20
NAT10	67	50			ALYREF	13	14	21			SMARCA2	16
DNAJA2	9	8			HNRNPUL2	31	26	31			SUGP1	14
SRSF7	12	12			CDK11B	17	17	20			BCAS2	14
ZNF512	19	15			PPP1CC	15	19	14			PARP2	10
DDOST	8	16			SRSF2	8	12	13			VPRBP	13
FASN	58	37			SUGP2	22	23	19			CSNK2A2	8
RFC3	19	16			SRP68	14	20	16			CBX8	15
TPM4	10	17			MCM3	15	27	20			VDAC3	8
SFPQ	34	37			POLRMT	21	14	16			HNRNPH2	9
LYN	9	13			BRD2	16	20	11			LENG8	9
SMPD4	18	10			DDX23	38	32	26			CTNNA2	9
RPS6	19	13			NONO	17	33	34			TAF4	12
MRPL3	10	9			HNRNPA3	22	27	17			XRCC1	9
URB1	38	31			RBBP4	16	20	14			HIST1H1C	21
PUM3	20	14			CHERP	25	21	14			GATAD2B	18
CTNNA1	43	38			MCM6	9	17	10			MRPL11	8
FARSB	16	14			SART3	11	9	13			DDX46	47
ASCC3	9	17			RBM39	29	21	18			H2AFX	16
H2BU1	22	44			IMP3	8	10	8			RPLP2	11
LUZP1	9	15			HDAC1	15	18	9			SCAF4	8
CPSF1	30	14			WBP11	16	16	10			SMARCE1	12
PDLIM7	12	9			MRPS22	12	14	13			MBD1	9
NOL8	25	14			HNRNPK	22	18	21			WAPAL	14
PRMT5	13	21			MFAP1	14	9	9			ATP2A3	9
NUP188	29	21			ADNP	45	29	24			CD3EAP	16
BAZ1B	58	34			NOL11	24	24	22			KIAA1429	14
NOP56	52	40			DDX39B	15	21	16
LMNB2	63	49			HNRNPUL1	8	8	13
KRT1	31	39			SUPT6H	47	46	42
PALLD	15	36			RPN2	11	14	17
MPHOSPH10	23	16			ZNF326	14	15	20
TBL3	41	32			CCAR2	16	14	16
ATAD2	40	27			AQR	31	28	13
BPTF	23	11			MRPS9	14	14	11
IMPDH2	23	19			TRMT10C	10	10	18
G3BP2	10	8			TAF15	8	18	26
RPS10	8	10			MCM5	18	30	28
RPL21	9	11			ACOT9	11	14	16
UTP18	27	19			UBTF	25	33	25
PHF6	16	15			CDC5L	44	29	28
DDX31	22	12			KHDRBS1	13	16	9
EED	10	9			ACSL5	19	8	16
SMC3	37	28			GAPDH	10	22	14
KPNA2	13	12			DKC1	28	29	23
DNMT1	23	20			TUFM	18	31	26
RPS23	11	8			SSBP1	9	9	8
SNRNP70	24	19			PDHB	9	8	13
NUP93	45	39			SUPT16H	51	77	68
ANLN	16	39			ILF3	24	41	38
DDX27	35	25			RUVBL2	24	27	19
MRPS34	10	10			DDX3X	28	38	38
SF3A1	40	27			USP39	17	16	12
EIF3A	30	18			HNRNPL	24	31	27
DDB2	8	8			VCP	12	27	31
SEPTIN11	8	13			GTF3C2	12	16	10
GNAI1	11	9			SRRM2	82	46	25
DDX47	21	19			HNRNPH3	11	8	10
BCLAF1	41	32			HNRNPA1	21	33	32
ITGB4	12	24			SEH1L	10	17	10
KRT13	10	16			MRPL37	10	9	14
TRA2B	19	14			KTN1	12	13	18
RPL7L1	17	11			SF3B3	54	54	39
RPL5	27	21			ZRANB2	8	9	11
PSMC2	10	13			SRSF4	9	15	11
GTPBP4	36	29			ARID1A	20	10	8
EEF1D	8	11			SNW1	30	28	17
H2AC18	19	17			ZC3H18	9	11	9
RRP1	18	15			HNRNPC	32	34	36
RPS15A	11	9			CCDC47	16	8	19
EIF4A1	18	20			CPSF2	18	15	11
ITPRID2	43	48			SF1	9	17	17
SRSF10	9	8			FXR1	13	22	27
SRPRA	16	9			ZMYM3	25	17	10
THOC2	19	12			CKAP4	12	12	24
MYO6	17	39			SRRM1	30	17	20
ALDH18A1	25	36			PARP1	57	75	57
UTP3	14	11			SNRPD2	10	13	10
ZNF280C	15	9			DDX55	12	10	9
CHD2	11	10
MSH6	56	47
WDR74	19	18
NUP160	46	30
SLC25A5	19	28
MYO1C	50	38
MCM7	27	14
RPL15	11	15
PRC1	8	10
HSPD1	37	42
BOP1	32	28
RPS3A	31	29
NDUFV1	8	18
CDK1	10	11
PRPF19	25	27
POLR2B	32	24
TASOR	19	9
KIAA1671	8	17
RPL12	12	9
DHX38	12	19
SAP18	13	8
RBM4	13	10
HSPA5	23	24
EMD	15	14
ABCF1	27	18
CCDC137	12	10
USP7	14	20
CPSF6	12	10
COPA	16	21
TRIM72	16	20
TONSL	10	12
CAD	19	8
INTS1	35	19
TMEM43	10	14
WDR43	32	29
COPG1	10	10
SON	34	37
PRPF8	130	106
RACGAP1	15	14
CCT2	12	14
NUP153	51	40
PABPC4	20	20
PSMD3	13	9
DDX6	12	16
MYH9	139	134
PPP2R1A	20	10
NKRF	20	18
RPL28	13	8
HNRNPM	30	56
SRSF1	27	18
HSD17B4	17	20
RPL18A	16	9
ESF1	30	22
TCERG1	16	20
XRN2	35	36
KRT16	12	17
FUS	17	15
LAD1	10	16
NOP2	39	29
HNRNPAB	8	9
DDX18	45	27
UBA52	12	14
CCT8	19	12
POGZ	29	11
SPTBN1	26	77
RPS4X	25	30
LUC7L2	14	9
CAMK2D	8	9
SND1	17	14
DHX33	17	9
SF3B1	68	57
SRP72	23	20
TRA2A	15	16
RPS3	27	15
RPL3	35	31
RAD18	10	9
PCM1	16	11
WDR75	25	30
H3-2	19	24
FARSA	12	9
ATR	22	8
RFC1	35	29
HELLS	25	18
H2AX	14	17
RBBP7	14	15
TRIP12	41	28
COIL	18	13
EFTUD2	61	45
NCBP1	8	10
DHX30	47	47
PRDX1	21	18
KDM2A	12	11
CWC22	15	10
SRPRB	8	12
PLEC	247	338
MACROH2A1	26	22
EZR	38	54
EXOSC10	21	25
SART1	30	24
MTDH	10	13
SLC25A6	14	18
HSP90AB1	36	30
FLNC	12	16
CCT3	19	14
MRPS27	10	12
RPL18	14	10
SPTAN1	47	93
POLDIP3	14	11
SMU1	19	16
ABCF2	19	13
RGPD5	32	29
HSP90B1	19	26
LSG1	9	12
KRR1	15	17
EMG1	17	12
SNU13	10	10
CAVIN1	11	11
UTP6	17	19
NOL6	35	25
DSG2	36	40
NUP88	17	14
EHMT1	9	9
GLG1	13	27
SUZ12	10	9
GCN1	97	85
KIFC1	17	15
MCM2	10	10
KRT18	18	112
TRRAP	31	24
SMC1A	41	25
HSPA8	33	37
DBN1	9	19
NGDN	14	13
IMMT	28	43
DHX15	43	38
LRRC59	15	14
DCAF13	19	16
HP1BP3	30	20
H2BC11	25	48
RPL9	13	15
RPS13	13	13
SUN1	25	23
WDR12	17	15
RPSA	10	8
RBM19	15	13
DDX54	40	34
FBL	23	24
TARDBP	13	11
NPLOC4	10	12
MED12	15	8
TRIM28	39	47
STAU1	15	13
DDX21	72	58
RCC2	23	23
CDC73	26	22
NOP58	39	31
HADHB	13	16
ADAR	43	40
EIF3L	14	9
LAS1L	20	15
POP1	25	22
NOC3L	34	19
H3C15	27	31
HCFC1	32	25
UTP11	10	9
AHNAK	65	58
KRT15	10	14
TUBA1B	27	19
NUP107	31	31
RPL4	38	26
PBRM1	32	21
DDX10	39	23
EIF4A3	32	30
ATP5F1C	9	8
PRPF3	24	14
SURF6	13	8
DDX24	38	27
RNF20	8	8
RTCB	9	16
RPL13	16	12
VAPA	9	12
RRP12	34	30
BAZ1A	32	16
RBBP6	11	12
SMTN	13	16
DDX17	25	28
RPL10	16	11
ACTB	48	79
TMPO	25	35
ASPH	8	14
ACIN1	8	32
ZC3HAV1	8	8
YY1	8	9
FLOT2	8	8
RPL23	19	10
DNTTIP2	24	21
KRT19	60	79
DDX51	18	11
YLPM1	15	11
ZMYM4	21	13
DDX1	11	16
AKAP8L	10	9
ZC3H11A	23	13
PLG	18	13
PPL	13	23
RPS2	18	20
SSRP1	42	38
SEPTIN7	8	20
CCT4	13	13
H2BC18	25	48
KDM1A	20	15
WDR5	8	9
MKI67	116	101
NUP54	18	12
PSMD1	10	12
AP2M1	9	9
OAS3	10	16
TOR1AIP1	12	13
RNF40	11	8
EWSR1	13	14
LIMA1	27	51
NOL9	19	12
RDX	15	27
EIF2S3	13	8
AP2A1	19	24
GRWD1	10	12
SRSF9	20	16
H2AC21	16	15
PDCD11	91	63
JUP	35	38
RPL7	28	24
PHB2	19	26
RBMX	36	25
MYOF	14	12
PSMC5	12	10
MRTO4	17	12
DDX39A	18	21
PAXBP1	15	13
CHAMP1	22	19
PRPF6	43	38
HNRNPA0	14	12
PCBP1	17	15
SMARCA5	72	45
CPSF3	14	12
MDN1	85	45
TCP1	10	16
RPL13A	17	10
GTF2I	43	27
RIF1	20	18
RBM26	13	22
ATP5F1B	30	45
RPN1	22	32
EIF3D	10	9
PDS5A	17	9
KIF4A	32	25
PKM	27	12
RPS7	18	20
USP36	28	12
CTNND1	35	30
RBM8A	12	9
TMEM209	18	8
ZFR	16	13
NCBP3	9	9
GPATCH4	17	12
NOLC1	8	28
HNRNPLL	9	11
KRT8	80	152
CANX	19	38
NUP85	22	16
EIF2S1	17	8
EBNA1BP2	18	15
CORO1C	11	16
ACADVL	10	12
PABPC1	34	32
WDR36	42	38
CCDC86	12	17
MYH10	59	59
TSR1	13	22
RUVBL1	29	22
WDR18	13	9
DDX52	22	16
RPL11	14	14
NDUFA9	9	12
DNAJA1	17	16
KRT10	26	34
MYH11	17	21
TUBB4B	30	23
H1-0	12	14
HADHA	16	21
CCT5	13	10
FDXR	17	8
RPL8	24	24
CDCP1	12	19
XRCC5	28	26
CSNK2B	9	10
RAB1A	8	11
KIF2C	17	16
CNP	9	11
KIF20A	12	10
EIF5A	9	9
PLRG1	18	20
RAD21	14	10
L3MBTL3	9	9
SNRPB	12	8
NUP133	49	32
CTNNB1	33	30
ATP6V1A	12	13
SLFN5	20	9
KRT5	16	20
HDGFL2	16	16
PCBP2	11	10
CGN	11	23
NUP205	60	42
LRPPRC	49	54
TOMM40	12	16
GNB1	11	12
RPL23A	15	11
DIEXF	25	21
SEPTIN9	21	33
RRS1	27	15
MPHOSPH8	12	9
RBM27	9	10
FLNB	40	69
PRKDC	142	138
NOC2L	18	18
PSIP1	14	15
PYCR1	11	12
PSMD2	13	15
CHTF18	20	14
AP2B1	10	24
U2AF1L5	15	13
POM121C	15	11
SMCHD1	49	35
EIF3E	8	12
NUMA1	121	80
ATP5F1A	28	42
IK	21	13
SNRNP200	127	89
TOP2B	42	33
SIN3A	22	17
PKP3	17	19
SETX	20	12
ORC4	10	9
CBX5	10	8
PRMT1	13	20
MPRIP	13	30
TEX10	18	11
PAF1	25	13
NLE1	10	8
CEBPZ	37	27
PSPC1	14	13
ALB	17	86
KIF22	20	14
SRRT	10	13
PPIB	10	10
ACTBL2	14	16
EIF4G2	15	15
GTF3C1	36	18
RPL17	12	13
BMS1	45	38
H1-10	8	10
MTREX	28	22
H2BC14	23	47
RRBP1	20	26
RPF1	16	10
GEMIN4	11	8
SPATS2L	10	14
SNRNP40	21	16
LMNA	25	72
VDAC1	14	30
PPIA	9	8
TJP1	24	43
PHB	19	28
DHX37	29	17
KPNB1	24	23
AATF	22	17
RBM12B	35	33
FTSJ3	36	24
SRSF5	11	9
SF3B2	51	37
ZC3H15	8	16
NUP43	10	9
UTP14A	31	24
UHRF1	34	37
NXF1	30	22
RRP1B	36	25
SEPTIN2	12	16
PAK1IP1	18	15
NMD3	23	29
GART	16	9
RSL1D1	38	24
PYCR2	8	10
TUBB3	19	17
RBM25	32	24
AHCTF1	60	39
TPR	77	50
RPL6	29	18
NSUN5	16	14
HMGA1	9	9
SUN2	10	8
WDR3	46	35
YTHDC1	16	11
RANBP2	114	104
LIG3	22	19
ORC5	10	11
RPS14	14	9
ATP2A2	25	41
RFC4	20	13
POM121	15	9
GNB2	12	16
RPL30	10	11
PNN	32	25
DDX41	25	16
MYO1D	21	19
ACTG1	48	82
DRG1	19	20
TRIM25	24	29
NUP62	8	9
RPS24	9	8
HNRNPU	45	50
KRI1	13	12
ATXN2L	9	24
RPL24	10	11
YES1	11	20
RPS16	13	15
CSNK2A1	16	16
RPS9	21	18
RFC5	20	15
RCC1	19	18
DIS3	10	12
SRSF3	13	19
FLNA	70	89
DDX56	23	16
RBM28	28	21
NDC1	11	9
IWS1	11	11
RPL14	11	9
KRT6A	22	29
Krt18	18	112
GEMIN5	9	11
NOL10	26	19
DDX20	10	9
CTTN	27	29
H4C1	29	36
KAT7	17	13
UTP15	24	24
MYBBP1A	61	39
EEF1A1P5	42	61
ATAD3A	26	25
PKP2	17	23
TCOF1	29	18
PSMC1	8	10
CLTC	41	49
RPL36AL	11	10
ZC3H14	20	27
MISP	10	20
RBMXL1	22	17
CAPZB	8	10
SHMT2	15	20
PTBP1	13	12
MACROH2A2	19	13
DDX50	22	19
GPC1	11	15
BRD1	13	11
RPP30	13	10
CDC40	13	14
H1-4	26	25
VDAC2	13	27
SETD3	25	33
HEATR1	62	55
PDLIM5	20	16
EEF1G	15	13
EEF1A1	47	73
KDM3B	9	13
METAP1	19	23
SMARCA1	31	18
RPF2	18	15
EIF4G1	13	24
UQCRC2	9	25
H1-2	24	22
VARS1	8	12
GNL2	22	19
PES1	26	22
SAFB	37	25
MAGEB2	12	16
NUP210	40	36
HSP90AA1	27	29
RANGAP1	35	18
RAB7A	8	13
PPP1CA	22	18
ITPR3	51	62
LBR	9	12
KIF23	17	18
TOP1	47	47
DHX9	73	64
CCT7	20	16
EEF1A2	25	30
KRT2	25	27
ZNF638	43	21

## Sheet: README
Complete list of proteins identified in the mass spectrometry experiment shown in Figure 4, including the corresponding peptide counts for each protein.
