# Supplementary material
Source: HighWire-hosted journal article supplement (doi:10.1101/gr.280534.125)
Supplement: Supplemental_Table_S3.xlsx [file Supplemental_Table_S3.xlsx]

## Sheet: Primers for qPCR
Table 3. Primers for qPCR
Name	Sequence (5' to 3')
GAPDH FW	AGCCACATCGCTCAGACAC
GAPDH Rev	GCCCAATACGACCAAATCC
ARAF FW	CGACTCATCAAGGGACGAAAG
ARAF Rev	CGACTCATCAAGGGACGAAAG
FAM193B FW	TCAAAGACTCCATCCGTGCC
FAM193B Rev	AGGGGAGCCCAAAGTCAAAG
PSD3 FW	AAACTCAGAGCCCAGAGGAAATGC
PSD3 Rev	TTGTTGTAGTGGCAGGCAGAAGTG
RPL31 FW	TTGTTGTAGTGGCAGGCAGAAGTG
RPL31 Rev	GCTCAACAAAGCTGTCTGGG
ADAM19 FW	GAGAGCTTCCCATTGCTTCT
ADAM19 Rev	TGGCTTGACCCTTCCTTAATC
PDE4B FW	TCCAGGAAAGAGACCTCCTAAA
PDE4B Rev	TGCCACGTCAGAATGGTAATG
SMIM6 FW	GCTGTCCTGCTTCTCATCTTAT
SMIM6 Rev	AGTCAGGTCACTCCTCTTCA
ZC4H2 FW	GCTGTGTGTCTTGGGATCTT
ZC4H2 Rev	GTTGGTCTGGCTCACTGATT

## Sheet: README
List of primer sequences used for qPCR validation of RNA-seq targets
